# Supplementary material
Source: PubMed Central journal article supplement (PMC3973732)
Supplement: rna-11-134-s01.pdf [file rna-11-134-s01.pdf]

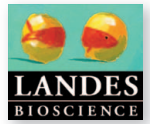

## Supplemental Material to:

Simei Yu, Johan Waldholm, Stefanie Böhm, Neus Visa

Brahma regulates a specific trans-splicing event at the  
*mod(mdg4)* locus of *Drosophila melanogaster*

2014; 11(2)

<http://dx.doi.org/10.4161/rna.27866>

[www.landesbioscience.com/journals/rnabiology/article/27866/](http://www.landesbioscience.com/journals/rnabiology/article/27866/)

## Supplementary Materials

|                                                                                                                     |      |
|---------------------------------------------------------------------------------------------------------------------|------|
| <b>Supplementary Figure S1:</b> The sequence features of the anti-sense 1 transcript .                              | p. 1 |
| <b>Supplementary Figure S2:</b> RT control reactions .....                                                          | p. 2 |
| <b>Supplementary Figure S3:</b> The association of BRM with the <i>mod(mdg4)</i> gene .....                         | p. 3 |
| <b>Supplementary Table S1:</b> The primer-pair combinations that were used<br>in the different RACE reactions ..... | p. 4 |
| <b>Supplementary Table S2:</b> The nucleotide sequences of the PCR products<br>shown in Figure 4. ....              | p. 5 |
| <b>Supplementary Table S3:</b> Nucleotide sequences of PCR primers.....                                             | p. 7 |
| <b>Supplementary Table S4:</b> The nucleotide sequences of the PCR products<br>obtained in the RACE reactions. .... | p. 9 |

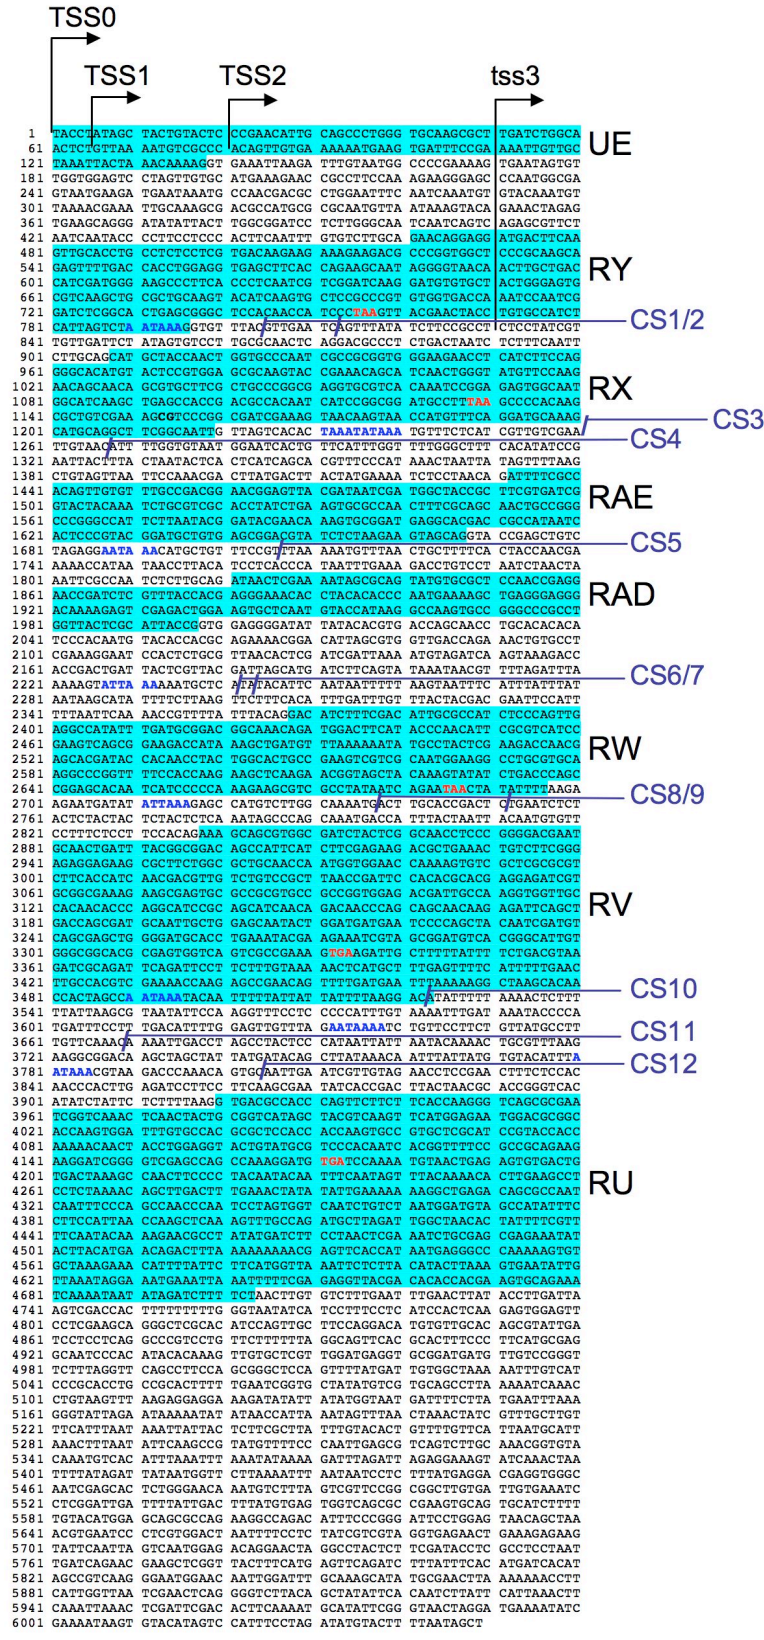

**Supplementary Figure S1: The sequence features of the anti-sense 1 transcript**  
 The figure shows the sequence of the anti-sense region 1 based on the DGM2-chr 3R gene prediction and on our own data. The trans-spliced exons are shown as blue boxes. The TSS and CS sites are indicated in the figure. Polyadenylation signals are highlighted in blue, and stop codons in frame are highlighted in red.

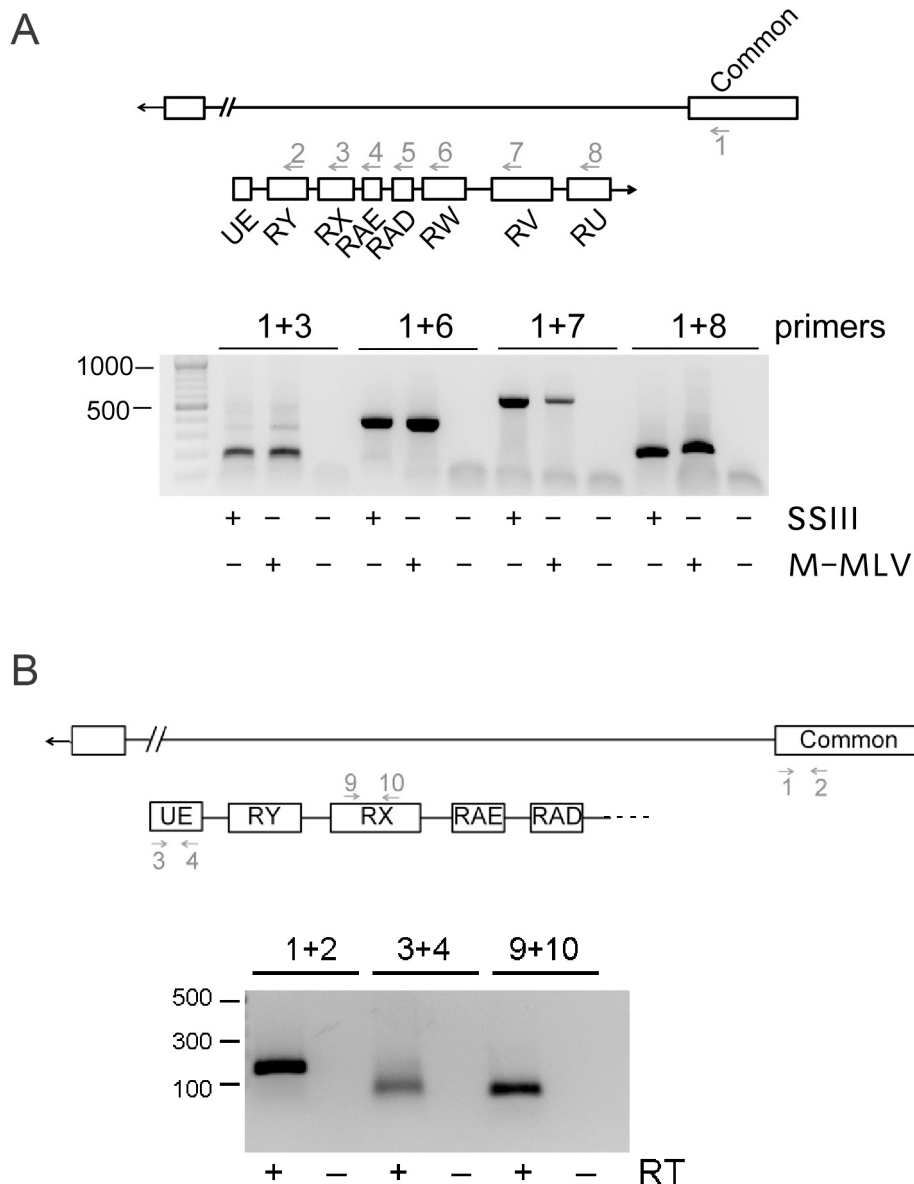

### Supplementary Figure S2. RT control reactions

**A.** *In vivo* analysis of the *mod(mdg4)* trans-splicing. The figure shows RT-PCR reactions in which the same trans-spliced products were amplified from *D. melanogaster* fly cDNA using two different reverse transcriptases, SuperScript III (SSIII) and Moloney Murine Leukemia Virus reverse transcriptase (M-MLV). The experiment also included control reactions without reverse transcriptase, as indicated. The primer-pairs used in each reaction and their positions are indicated in the figure.

**B.** RT(−) control reactions using total RNA purified from S2 cells. The purified RNA was treated with DNase (Turbo DNA-free kit) and reverse transcribed with Superscript III (Invitrogen) using random primers. Control reactions without reverse transcriptase (RT−) were carried out in parallel. The resulting cDNAs were used as templates in PCR reactions with the primer-pairs indicated in the figure.

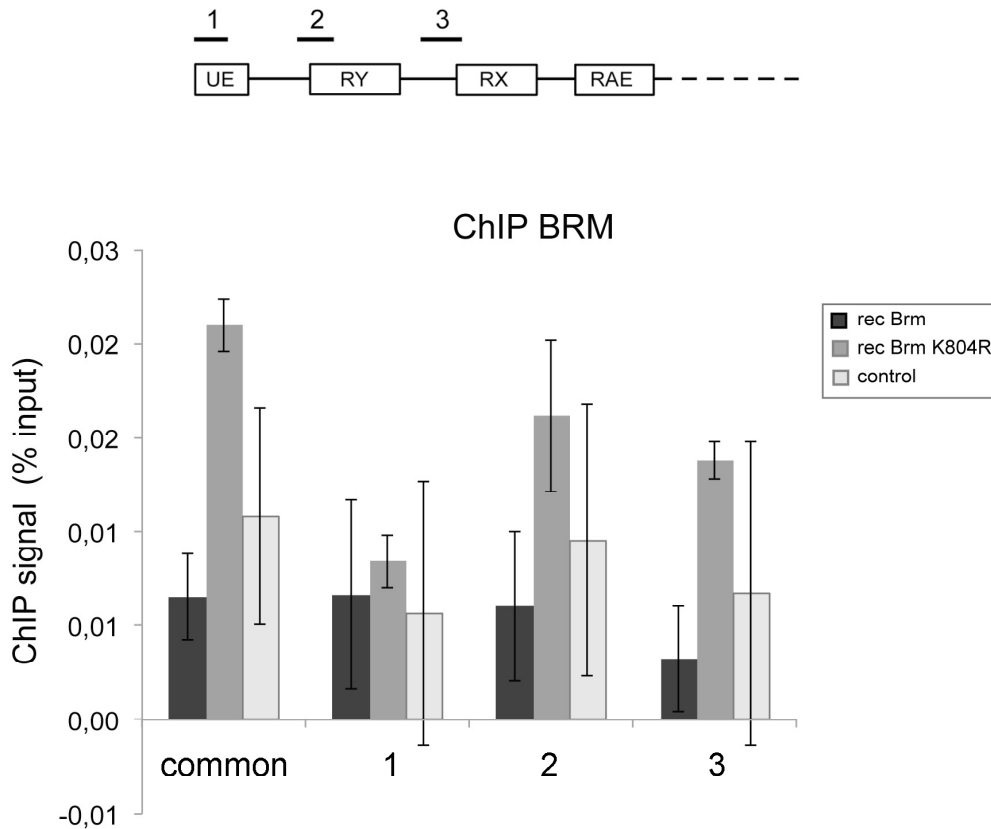

### Supplementary Figure S3. The association of BRM with the *mod(mdg4)* gene

The association of BRM with the *mod(mdg4)* gene was analyzed by ChIP. Chromatin was extracted from either S2 control cells or from S2 cells that over-expressed either recombinant recBRM or recBRM-K804R proteins, as in Figure 7. The cells were fixed with formaldehyde and immunoprecipitation reactions were carried out with an antibody against the human BRG1 protein that cross-reacts with the BRM of *D. melanogaster*. A negative control immunoprecipitation was carried out in parallel without primary antibody. The immunoprecipitated DNA was analyzed by qPCR using a standard curve for each primer pair. Primer pairs we designed to quantify the sense promoter region (*common*) and three genomic regions within the anti-sense region 1. The values obtained in no-antibody controls were subtracted, and the resulting signals were expressed relative to input. The histograms show average folds and the error bars represent standard deviations calculated from three independent experiments (n=3).

**Supplementary Table S1.****The primer-pair combinations that were used in the different RACE reactions.**

| <b>RACE</b> | <b>1st PCR primers</b> | <b>2nd PCR primers</b>     |                                 |
|-------------|------------------------|----------------------------|---------------------------------|
| TSS1        | 5RACE outer+RY1R       | 5RACE inner+RY1R           | Clone nested PCR product        |
| TSS2        | 5RACE outer+RY1R       | 5RACE inner+RY1R           | Clone nested PCR product        |
| TSS3        | 5RACE outer+RXR        | 5RACE inner+RXR            | Clone nested PCR product        |
| CS1         | COMMON F+3RACE outer   | RY F+3RACE inner           | Purify gel band from nested PCR |
| CS2         | COMMON F+3RACE outer   | RY exon junc F+3RACE inner | Clone nested PCR product        |
| CS3         | COMMON F+3RACE outer   | RX exon junc F+3RACE inner | Clone nested PCR product        |
| CS4         | COMMON F+3RACE outer   | RX exon junc F+3RACE inner | Clone nested PCR product        |
| CS5         | COMMON F+3RACE outer   | RAE F+3RACE inner          | Clone nested PCR product        |
| CS6         | COMMON F+3RACE outer   | RAE F+3RACE inner          | Clone nested PCR product        |
| CS7         | COMMON F+3RACE outer   | RAD or RAE F+3RACE inner   | Purify gel band from nested PCR |
| CS8         | COMMON F+3RACE outer   | RW F+3RACE inner           | Purify gel band from nested PCR |
| CS9         | COMMON F+3RACE outer   |                            | Clone PCR product               |
| CS10        | COMMON F+3RACE outer   | RV F+3RACE inner           | Purify gel band from nested PCR |
| CS11        | COMMON F+3RACE outer   | RV F+3RACE inner           | Purify gel band from nested PCR |
| CS12        | COMMON F+3RACE outer   | RV F+3RACE inner           | Purify gel band from nested PCR |

## Supplementary Table S2.

### The nucleotide sequences of the bands in Figure 4.

>Figure4B\_a

CAGGCGCACATGTACTCCGTGGAACGCAAGTACCGAAACAGCATCAACTGGGTATGTTCC  
AAGAACAGCAACAGTGTGTTACGCTGCCC GGCGAGGTGCGTCACAAATCCGGAGAGTGGC  
AATGGCATCAAGCTGAGCCACCGACGCCACAATCATCCGGCGGATGCCTTTAAGCCCCAC  
AAGCGCTGTTGAAAGCGTCCC GGCGATCGAAAAGTAACAAGTAACCATGT TTCAGGATGCA  
AAGCATGCAGGCTTCGGCAATTATTTTCGCCACGATT

>Figure4B\_b

AGGGCACATGTACTCCGTGGAACGCAAGTACCGAAACAGCATCAACTGGGTATGTTCCAA  
GAACAGCAACAGTGTGTTACGCTGCCC GGCGAGGTGCGTCACAAATCCGGAGAGTGGCAA  
TGGCATCAAGCTGAGCCACCGACGCCACAATCATCCGGCGGATGCCTTTAAGCCCCACAA  
GCGCTGTTGAAAGCGTCCC GGCGATCGAAAAGTAACAAGTAACCATGT TTCAGGATGCAAA  
GCATGCAGGCTTCGGCAATTATTTTCGCCACAGTTGTGTTTGCCGACGGAACGGAGTTAC  
GATAATCGATGGCTACCGCTTCGTGATCGGTACTACAAATCTGCGTCGCACCTATCTGAA  
GTGCGCCAACCTTTCGCAGCAACTGCCGGGCCCGGGCCATTCTTAATACGGACACGAACAA  
AGTGC GGATGAGGCACGACCGCCATAATCACTCTCGTACGGATGCTGTGAGCGGACGTAT  
CTCTAAGAAGTAGCAGATAACTCGAAAATAGCGCAGTATGTGCGCTCCAACCGAGGAACC  
GATCTCGTTTACCACGAGGGAAACACCTACACACCCAATGAAAACCTTG

>Figure4B\_c

AGGTGCACATGTACTCCGTGGAACGCAAGTACCGAAACAGCATCAACTGGGTATGTTCCA  
AGAACAGCAACAGTGTGTTACGCTGCCC GGCGAGGTGCGTCACAAATCCGGAGAGTGGCA  
ATGGCATCAAGCTGAGCCACCGACGCCACAATCATCCGGCGGATGCCTTTAAGCCCCACA  
AGCGCTGTTGAAAGCGTCCC GGCGATCGAAAAGTAACAAGTAACCATGT TTCAGGATGCAA  
AGCATGCAGGCTTCGGCAATTATTTTCGCCACAGTTGTGTTTGCCGACGGAACGGAGTTA  
CGATAATCGATGGCTACCGCTTCGTGATCGGTACTACAAATCTGCGTCGCACCTATCTGA  
AGTGC GGCAACTTTCGCAGCAACTGCCGGGCCCGGGCCATTCTTAATACGGACACGAACA  
AAGTGC GGATGAGGCACGACCGCCATAATCACTCTCGTACGGATGCTGTGAGCGGACGTA  
TCTCTAAGAAGTAGCAGATAACTCGAAAATAGCGCAGTATGTGCGCTCCAACCGAGGAA  
CCGATCTCGTTTACCACGAGGGAAACACCTACACACCCAATGAAAAGCTGAGGGAGGGAC  
AAAAGAGTCGAGACTGGAAGTGCTCAATGTACCATAAGGCCAAGTGCCGGGCCCGCCTGG  
TTACTCGCATTACCGGTGGAGGGGATATTATACACGTGACCAGCAACCTGCACACACATC  
CCACAATGTACACCACGCAGAAAACGGACATTAGCGTGGTTGACCAGAACTGTGCCTCG  
AAAGGAATCCACTCTGCGTTAACACTCGATCGATTAATAATGTAGATCAAGACATCTTTCG  
ACATTGCGCCATCTCCAGTTGAGGCCATATTTGATGCGGACGGCAAACAGATGGACTTC  
ATACCAACATTCGCGTCATCCGAAGTCAGCGGAG

>Figure4B\_d

CAGGGCACATGTACTCCGTGGAACGCAAGTACCGAAACAGCATCAACTGGGTATGTTCCA  
AGAACAGCAACAGTGTGTTACGCTGCCC GGCGAGGTGCGTCACAAATCCGGAGAGTGGCA  
ATGGCATCAAGCTGAGCCACCGACGCCACAATCATCCGGCGGATGCCTTTAAGCCCCACA  
AGCGCTGTTGAAAGCGTCCC GGCGATCGAAAAGTAACAAGTAACCATGT TTCAGGATGCAA  
AGCATGCAGGCTTCGGCAATTGACATCTTTTCGACATTGCGCCATCTCCAGTTGAGGCCA  
TATTTGATGCGGACGGCAAACAGATGGACTTCATACCCAACATTCGCGTCATCCGAAGTC  
AGCGGAAGACCATAAAGCTGATGTTTTAAAAAATATGCCTACTCGAAGACCAACGAGCAG  
ATACCACAACCTACTGGCACTGCCGAAGTCGTGCGCAATGGAAGGCCTGCGTGCAAGGCC  
GGTTTTCCACCAAGAAGCTCAAGAACGGTAGCTACAAAGTATATCTGACCCAGCCGGAAA  
CTTCTGC

>Figure4B\_e

CATCTTCAGGGGCACATGTACTCCGTGGAACGCAAGTACCGAAACAGCATCAACTGGGTA  
TGTTC AAGAACAGCAACAGTGTGTTACGCTGCCC GGCGAGGTGCGTCACAAATCCGGAG  
AGTGGCAATGGCATCAAGCTGAGCCACCGACGCCACAATCATCCGGCGGATGCCTTTAAG

CCCACAAGCGCTGTTGAAAGCGTCCCGGCGATCGAAAGTAACAAGTAACCATGTTTCAG  
GATGCAAAGCATGCAGGCTTCGGCAATTATTTTCGCCACAGTTGTGTTTGCCGACGGAAC  
GGAGTTACGATAATCGATGGCTACCGCTTCGTGATCGGTACTACAAATCTGCGTTCGCACC  
TATCTGAAGTGCGCCAACTTTCGCAGCAACTGCCGGGCCCGGGCCATTCTTAATACGGAC  
ACGAACAAAGTGC GGATGAGGCACGACCGCCATAATCACTCTCGTACGGATGCTGTGAGC  
GGACGTATCTCTAAGAAGTAGCAGATAACTCGAAAATAGCGCAGTATGTGCGCTCCAACC  
GAGGAACCGATCTCGTTTACCACGAGGAAACACCTACACACCCAATGAAAAGCTGAGGG  
AGGGACAAAAGAGTTCGAGACTGGAAGTGCTCAATGTACCATAAGGCCAAGTGCCGGGCC  
GCCTGGTTACTCGCATTACCGGTGGAGGGGATATTATACACGTGACCAGCAACCTGCACA  
CACATCCCACAATGTACACCACGCAGAAAACGGACATTAGCGTGGTTGACCAGAACTGT  
GCCTCGAAAGGAATCCACTCTGCGTTAACACTCGATCGATTAAAATGTAGATCAAGTGAC  
GCCACCCAGTTCTTCTTACCAAGGGTCAGCGCAATCGGTCAAACCTAACTACTGCGGT  
CATAGCTACGTCAGTCTG

>Figure4C\_d

GTCGTCGCAATGGAAGGCCTGCGTGCAAGGCCCGGTTTTCCACCAAGAAGCTCAAGAACGAA  
AGCAGCGTGGCGATCTACTCGGCAACCTCCCGGGACGAATGCAACTGATTTACGGCGGACA  
GCCATTCATCTTCGAGAAGACGCTGAAACTGTCTTCGGGAGAGGAGAAGCGCTTCTGGCGCT  
GCAACCAATGGTGGAAACCAAAAGTGTGCTCGCGCTTTCACCATCAACGACGTTGTCTGT  
CCGCTTAACCGATTCCACACGCATGAGGAGATCGTGCGGCGAAAGAAGCGAGTGCGCCGCGT  
GCCGCCGGTGGAGACGATTGCCAAGGTGGTTGCCACAACACCCAGGCATCCGCAGCATCAAC  
AGACAACCCAGCAGCCACAAGAGATTCAGCTGCCAGAGATGCAATTGATGGAGCAATACTG  
GACGATGAATCCCCAGCTACAATCGATGTCAGCGAGCTGGGGATGCATCTGAAATACGAAGA  
AATCGTAGCGGATGTCACGGGCATTGTGGGCGGCACGCGAGTGGTCAGTCGCCGAAAGTGAA  
TATTGCTTTTTTATTTTCTGACGTGACGCCACCCAGTTCTTCTTACCAAGGGTCAGCGCGAA  
TCGGTCAAACCTAACTACTGCGTCATGCAC

>Figure4C\_f

GAAAGAAGCGAGTGCGCCGCGTGCCGCCGGTGGAGACGATTGCCAAGGTGGTTGCCACAACA  
CCCAGGCATCCGCAGCATCAACAGACAACCCAGCAGCAACAAGAGATTCAGCTGACCAGCGA  
TGCAATTGCTGGAGCAATACTGGACGATGAATCCCCAGCTACAATCGATGTCAGCGAGCTGG  
GGATGCATCTGAAATACGAAGAAATCGTAGCGGATGTCACGGCATTGTGGGCGGCACGCGA  
GTGGTCAGTCGCCGAAAGTGAATATTGCTTTTTTATTTTCTGACGTGACGCCACCCAGTTCTT  
CTTACCAAGGGTCAGCGCGAATCGGTCAAACCTAACTAC



**Supplementary Table S3**  
**Nucleotide sequences of PCR primers.**

**Primers used for RT-PCR and RT-qPCR**

Actin 2 F GCACACCCACAAGCTTACACA  
Actin 2 R TTGCGCTTTGGGAAATATCTTC  
Mod(mdg4) Common F CACCCACGCTATCGTATTCC  
Mod(mdg4) Common R CGTTAGCCCCTTGATTTGC  
Mod(mdg4) UE F outer TGTACTCCCGAACATTGCAG  
Mod(mdg4) UE R TGTGGGCGACATTTTAACAG  
Mod(mdg4) RY intron F TTAAGTGGCGGATCCTCTTG  
Mod(mdg4) RY F CCCGGTGGCTCCCGCAAGCAGAG  
Mod(mdg4) RY middle R ATCCTTGATCCGACGATTGA  
Mod(mdg4) RYRX junc F CTAATAAAGCATGCTACCAACTG  
Mod(mdg4) RX intron F GGACGCCCTCTGACTAATCTC  
Mod(mdg4) RX F CTACCAACTGGTGCCCAATC  
Mod(mdg4) RX R AGTACATGTGCCCTGGAAG  
Mod(mdg4) RAE F AATCTGCGTCGCACCTATCT  
Mod(mdg4) RAE R CAAACACAACCTGTGGCGAAA  
Mod(mdg4) RAD F GGAACCGATCTCGTTTACCA  
Mod(mdg4) RAD R CTCCCTCAGCTTTTCATTGG  
Mod(mdg4) RW F AGACCAACGAGCACGATAC  
Mod(mdg4) RW R TCCGGCTGGGTCAGATATAC  
Mod(mdg4) RV F GAAACTGTCTTCGGGAGAGG  
Mod(mdg4) RV R ACAATGCCCGTGACATCC  
Mod(mdg4) RU R GCGTCCATTCTCCATGAACT  
Mod(mdg4)-prom F AACACTTCTAATTTTCACGTC  
Mod(mdg4)-prom R ACTAACTAAAGCCAGAGTTTTT  
Mod(mdg4) RY-RU nt 57 F GGCAACTCTGTAAAATGTC  
Mod(mdg4) RY-RU nt 150 R TCTTAATTTACCTTTTGTTT  
Mod(mdg4) RY-RU nt 829 F CTCTCCTATCGTTGTTGATT  
Mod(mdg4) RY-RU nt 907 R CTGCAAGAATTGAAAGAGAT

**Primers used for synthesis of dsRNA**

Brm BKNT7 F taatacgaactcactatagggagaAAGCCCAATCGCATTACAAC  
Brm BKNT7 R taatacgaactcactatagggagaTGAAGTGTATCAGCCGCTTG  
Brm HFAT7 F TTAATACGACTCACTATAGGGAGAgtttcgctgtacaataacaat  
Brm HFAT7 R TTAATACGACTCACTATAGGGAGAatgtggagcaggacttaag  
GFP T7 F taatacgaactcactatagggagaATGGTGAGCAAGGGCGAGGAGCTG  
GFP T7 R taatacgaactcactatagggagaGCGGTCACGAACTCCAGCAG

**Primers used for Northern blot probe**

Mod(mdg4) const probe 2 CTTGAGCCTCTGTGTTGCCCTGATC  
Mod(mdg4) RX probe 2 CGATTGGGCACCCAGTTGGTAGCATG

Mod(mdg4) const+RX junction probe

CGATTGGGCACCAGTTGGTAGCATGCTTGAGCCTCTGTGTTGCCCTGATC

### **Primers for RACE**

5'RACE adapter

GCUGAUGGCGAUGAAUGAACACUGCGUUUGCUGGCUUUGAUGAAA

5RACE outer GCTGATGGCGATGAATGAACACTG

5RACE inner CGCGGATCCGAACACTGCGTTTGCTGGCTTTGATG

3'RACE adapter GCGAGCACAGAATTAATACGACTCACTATAGGT12VN

3RACE outer GCGAGCACAGAATTAATACGACT

3RACE inner CGCGGATCCGAATTAATACGACTCACTATAGG

Mod(mdg4) RY F CCCGGTGGCTCCCGCAAGCAGAG

Mod(mdg4) RY exon junc F CAGAGGCTCAAGGAACAGGA

Mod(mdg4) RY 1R GGGATGGTTGTGGAGCCCGC

Mod(mdg4) RX F CTACCAACTGGTGCCCAATC

Mod(mdg4) RX exon junc F CAGAGGCTCAAGCATGCTACC

Mod(mdg4) RX R AGTACATGTGCCCTGGAAG

Mod(mdg4) RAE F AATCTGCGTCGCACCTATCT

Mod(mdg4) RAD F GGAACCGATCTCGTTTACCA

Mod(mdg4) RW F AGACCAACGAGCACGATAC

Mod(mdg4) RV F GAAACTGTCTTCGGGAGAGG

### **Primers used for cloning the Brm wide type and K804 mutant**

Brm-K804R CCGATGAAATGGGTTTGGGTCGAACCATTCAAACCATTTCGC

Brm-K804R antisense

GCGAAATGGTTTGAATGGTTCGACCCAAACCCATTTTCATCGG

Brm-SpeI F GATAACTAGTAAGTCAAGAAAGGAGCTGCAA

Brm-SacII R GAATCCGCGGGTCCATGTCATCGTCGTCAT

### **Primers used for cloning the mod(mdg4) anti-sense strand**

Mod(mdg4) AS 5UTR F SpeI GCACTAGTTGTACTCCCGAACATTGCAG

Mod(mdg4) RW intron R EcoRV ATCCGGATATCTTCCTTTCGAGGCACAGTTT

**Supplementary Table S4.**

**The nucleotide sequences of the PCR products obtained in the RACE reactions.**

>TSS1\_RY1R\_RY1R

CTTGCGCCTGAATTTTGTAAAATTCGCGTTAAATTTTTGTAAATCAGCTCATTTTTTAAC  
CAATAGGCCGAAATCGGCAAAATCCCTTATAAATCAAAGAATAGACCGAGATAGGGTTGAG  
TGTTGTTCCAGTTTGGAAACAAGAGTCCACTATTAAGAACGTGGACTCCAACGTCAAAGGC  
GAAAACCGTCTATCAGGGCGATGGCCCACTACGTGAACCATCACCTAATCAAGTTTTTTG  
GGGTCGAGGTGCCGTAAAGCACTAAATCGGAACCCTAAAGGGAGCCCCGATTTAGAGCTTG  
ACGGGAAAGCCGGCGAACGTGGCGAGAAAGGAAGGAAAGAAAGCGAAAGGAGCGGGCGCTA  
GGGCGCTGGCAAGTGTAGCGGTCACGCTGCGCGTAACCACCACACCCGCCGCTTAATGCG  
CCGCTACAGGGCGCGTCCATTCGCCATTAGGCTGCGCAACTGTTGGGAAGGGCGATCGGTG  
CGGGCCTCTTCGCTATTACGCCAGCTGGCGAAAGGGGGATGTGCTGCAAGGCGATTAAGTTG  
GGTAACGCCAGGGTTTTCCAGTACGACGTTGTAAAACGACGGCCAGTGAATTGTAATACG  
ACTACTATAGGGCGAATTGGGCCCTCTAGATGCATGCTCGAGCGGCCCGCAGTGTGATGGA  
TATCTGCAGAATTCGCCCTTCGCGGATCCGAACACTGCGTTTGCTGGCTTTGATGAAAAGTTA  
AAATGTCGCCACAGTTGTGAAAAAATGAAGTGATTTCCGAAAATTGTTGCTAAATTACTAA  
ACAAAAGGAGGATGACTTCAAGTTGCACCTGCCTCTCCTCGTGACAAGGAGAAAGAAGACGC  
CCGGTGGCTCCCAGCAAGCAGAGAAGGGCGAATTCAGCACACTGGCGGCCGTTACTAGTGGA  
TCCGAGCTCGTA

>TSS2\_RY1R\_RY1R

TTGCGCCTGAATTTTGTAAAATTCGCGTTAAATTTTTGTAAATCAGCTCATTTTTTAACC  
AATAGGCCGAAATCGGCAAAATCCCTTATAAATCAAAGAATAGACCGAGATAGGGTTGAG  
TGTTGTTCCAGTTTGGAAACAAGAGTCCACTATTAAGAACGTGGACTCCAACGTCAAAGGC  
GAAAACCGTCTATCAGGGCGATGGCCCACTACGTGAACCATCACCTAATCAAGTTTTTTG  
GGGTCGAGGTGCCGTAAAGCACTAAATCGGAACCCTAAAGGGAGCCCCGATTTAGAGCTTG  
ACGGGAAAGCCGGCGAACGTGGCGAGAAAGGAAGGAAAGAAAGCGAAAGGAGCGGGCGCTA  
GGGCGCTGGCAAGTGTAGCGGTCACGCTGCGCGTAACCACCACACCCGCCGCTTAATGCG  
CCGCTACAGGGCGCGTCCATTCGCCATTAGGCTGCGCAACTGTTGGGAAGGGCGATCGGTG  
CGGGCCTCTTCGCTATTACGCCAGCTGGCGAAAGGGGGATGTGCTGCAAGGCGATTAAGTTG  
GGTAACGCCAGGGTTTTCCAGTACGACGTTGTAAAACGACGGCCAGTGAATTGTAATACG  
ACTACTATAGGGCGAATTGGGCCCTCTAGATGCATGCTCGAGCGGCCCGCAGTGTGATGGA  
TATCTGCAGAATTCGCCCTTCGCGGATCCGAACACTGCGTTTGCTGGCTTTGATGAAAACAG  
TTGTGAAAAAATGAAGTGATTTCCGAAAATTGTTGCTAAATTACTAAAACAAAAGAAGCAGGAG  
GATGACTTCAAGTTGCACCTGCCTCTCCTCGTGACAAGGAGAAAGAAGACGCCCGGTGGCTC  
CCGCAAGCAGAGAAGGGCGAATTCAGCACACTGGCGGCCGTTACTAGTGGATCCGAGCTCG  
TA

>TSS3\_RXR\_RXR

CTTGTCAGATAGCCAGTAGCTGACATTCATCCGGGGTCAGCACCGTTTCTGCGGACTGGC  
TTTCTACGTGTTCCGCTTCTTTAGCAGCCCTTGCGCCCTGAATTTTGTAAAATTCGCGTT  
AAATTTTTGTAAATCAGCTCATTTTTTAACCAATAGGCCGAAATCGGCAAAATCCCTTATA  
AATCAAAGAATAGACCGAGATAGGGTTGAGTGTGTTCCAGTTTGGAAACAAGAGTCCACTA  
TTAAAGAACGTGGACTCCAACGTCAAAGGGCGAAAACCGTCTATCAGGGCGATGGCCCACT  
ACGTGAACCATCACCTAATCAAGTTTTTTGGGGTCGAGGTGCCGTAAAGCACTAAATCGGA  
ACCCTAAAGGGAGCCCCGATTTAGAGCTTGACGGGAAAGCCGGCGAACGTGGCGAGAAAG  
GAAGGAAAGAAAGCGAAAGGAGCGGGCGCTAGGGCGCTGGCAAGTGTAGCGGTCACGCTGCG  
CGTAACCACCACACCCGCCGCTTAATGCGCCGCTACAGGGCGCGTCCATTCGCCATTAG  
GCTGCGCAACTGTTGGGAAGGGCGATCGGTGCGGGCCTCTTCGCTATTACGCCAGCTGGCGA  
AAGGGGATGTGCTGCAAGGCGATTAAGTTGGGTAACGCCAGGGTTTTCCAGTACGACGCT  
TGTAACGACGCGCCAGTGAATTGTAATACGACTACTATAGGGCGAATGGGCCCTCTAGA  
TGCATGCTCGAGCGGCCCGCAGTGTGATGGATATCTGCAGAATTCGCCCTTCGCGGATCCGA  
ACACTGCGTTTTGCTGGCTTTGATGAAACTTCCGCTCTCCTATCGTTGTTGATTCTATAGTG  
TCCTTGCAGCAACTCAGGACGCCCTCTGACTAATCTCTTTCAATTCCTTGCAGCATGCTACCAA

CTGGTGCCCAATCGCCGCGGTGGGAAGAACCTCATCTTCCAGGGGCACATGTACTAAGGGCG  
AATTCAGCACACTGGCGGCCGTTACTAGTGAT

>CS1\_Common F\_RY F

GGTGAGCTTACCAGAAGCAATAGGGGTAACAACCTTGCTGACCATCGATGGGAAGCCCTTCA  
CCCTCAATCGTCGGATCAAGGATGTGTGCTACTGGGAGTGCCTCAAGCTGCGCTGCAAGTAC  
ATCAAGTGCTCCGCCCGTGTGGTGACCAAATCCAATCGGATCTCGGCACTGAGCGGGCTCCA  
CAACCATCCCTAAGTTACGAACTACCTGTGCCATCTCATTAGTCTAATAAAGGTGTTTACGT  
TGAATCAAAAAAAAAAAAAA

>CS2\_Common F\_RY exon junc F

TCACATGTTCTTTCCTGCGTTATCCCTGATTCTGTGGATAACCGTATTACCGCCTTTGAGTG  
AGCTGATACCGCTCGCCGAGCCGAACGACCGAGCGCAGCGAGTCAGTGAGCGAGGAAGCGG  
AAGAGCGCCCAATACGCAAACCGCCTCTCCCCGCGCTTGGCCGATTCAATTAATGCAGCTGG  
CACGACAGGTTTCCCGACTGGAAAGCGGGCAGTGAGCGCAACGCAATTAATGTGAGTTAGCT  
CACTCATTAGGCACCCAGGCTTTACACTTTATGCTTCCGGCTCGTATGTTGTGTGGAAATTG  
TGAGCGGATAACAATTTACACAGGAAACAGCTATGACCATGATTACGCCAAGCTTGGTACC  
GAGCTCGGATCCACTAGTAACGGCCGCCAGTGCTGGAATTCGCCCTTTACGAGCGGTGGC  
GGAGTGACGGCGACCACTTCCAAGGCTGTGGTCAAGCAACAGTCCCAGAACTACAGTGAATC  
ATCGTTTGTGACACCAGCGGGGATCAGGGCAACACAGAGGCTCAAGAACAGGAGGATGACT  
TCAAGTTGCACCTGCCTCTCCTCGTGACAAGGAGAAAGAACGCCCGGTGGCTCCCACAAG  
CAGAGTTTTGACCACCTGGAGGTGAGCTTACCAGAAGCAACAGGGGTAACAACCTTGCTGAC  
CATCGATGGGAAGCCCTTACCCTCAATCGTCGGATCAAGGATGTGTGCTACTGGGAGTGCG  
TCAAGCTGCGCTGCAAGTACATCAAGTGCTCCGCCCGTGTGGTGACCAAATCCAATCGGATC  
TCGGCACTGAGCGGGCTCCACAACCATCCCTAAGTTACGAACTACCTGTGCCATCTCATTAG  
TCTAATAAAGGTGTTTACGCAAAAAAAAAAAAAAACCCTATAGTGAGTCGTATTAATTCTGTGCT  
CGCAAGGGCGAATTCTGCAGATATCCATCACACTGGCGGCCGCTCGAGCATGCATC

>CS\_3 Common F\_RX exon junc F

TCGAGCGGCCCGCCAGTGTGATGGATATCTGCAGAATTCGCCCTTCAGAGGCTCAAGCATGCT  
ACCAACTGGTGCCCAATCGCCGCGGTGGGAAGAACCTCATCTTCCAGGGGCACATGTACTCC  
GTGGAACGCAAGTACCGAAACAGCATCAACTGGGTATGTTCCAAGAACAGCAACAGTGTGTT  
ACGCTGCCCGGCGAGGTGCGTCACAAATCCGAGAGTGGCAATGGCATCAAGCTGAGCCACC  
GACGCCACAATCATCCGGCGGATGCCTTTAAGCCCCACAAGCGCTGTTGAAAGCGTCCCAGC  
GATCGAAAGTAACAAGTAACCATGTTTTCAGGATGCAAAGCATGCAGGCTTCGGCAATTGTTA  
GTCACACTAAATATAAATGTTTCTCATCGTTGTCGAAAAAAAAAAAAAAAAACCTATAGTGAGTCG  
TATTAATTCGGATCCGCGAAGGGCGAATTCCAGCACACTGGCGGCCGTTACTAGTGGATCCG  
AGCTCGGTACCAAGCTTGGCGTAATCATGGTCATAGCTGTTTCCCTGTGTGAAATTGTTATCC  
GCTCACAATTCACACAACATACGAGCCGGAAGCATAAAGTGTAAGCCTGGGGTGCCTAAT  
GAGTGAGCTAACTCACATTAATGCGTTGCGTCACTGCCCGCTTTCAGTCCGGAAACCTG  
TCGTGCCAGCTGCATTAATGAATCGGCCAACGCGCGGGGAGAGGCGGTTGCGTATTGGGCG  
CTCTTCCGCTTCCCTCGCTCACTGACTCGCTGCGTCCGGTCCGCTCGGCTCGCGCGAGCGGTAT  
CAGCTCACTCAAAGGCGGTAATACGGTTATCCACAGAATCACGGGATAACGCACG

>CS4\_Common F\_RX exon junc F

CGAGCGGCCCGCCAGTGTGATGGATATCTGCAGAATTCGCCCTTCAGAGGCTCAAGCATGCTA  
CCAACCTGGTGCCCAATCGCCGCGGTGGGAAGAACCTCATCTTCCAGGGGCACATGTACTCCG  
TGGAACGCAAGTACCGAAACAGCATCAACTGGGTATGTTCCAAGAACAGCAACAGTGTGTTA  
CGCTGCCCGGCGAGGTGCGTCACAAATCCGGAGAGTGGCAATGGCATCAAGCTGAGCCACC  
ACGCCACAATCATCCGGCGGATGCCTTTAAGCCCCACAAGCGCTGTTGAAAGCGTCCCAGC  
ATCGAAAGTAACAAGTAACCATGTTTTCAGGATGCAAAGCATGCAGGCTTCGGCAATTGTTAG  
TCACACTAAATATAAATGTTTCTCATCGTTGTCGAAACAAAAAAAAAAAAAAAAACCTATAGTGAG  
TCTATTAATTCGGATCCGCGAAGGGCGAATTCCAGCACACTGGCGGCCGTTACTAGTGGATC  
CGAGCTCGGTACCAAGCTTGGCGTAATCATGGTCATAGCTGTTTCCCTGTGTGAAATTGTTAT  
CCGCTCACAATTCACACAACATACGAGCCGGAAGCATAAAGTGTAAGCCTGGGGTGCCTA  
ATGAGTGAGCTAACTCACATTAATGCGTTGCGTCACTGCCCGCTTTCAGTCCGGAAACCC  
TGTCGTGCCAGCTGCATTAATGAATCGGCCAACGCGCGGGGAGAGGCGGTTTGCATATTGGG

CGCTCTTCCGCTTCCTCGCTCACTGACTCGCTGCGCTCGGTCGTTCCGGCTGCGGCGAGCGGT  
ATCAGCTCACTCAAAGGCGGTAATACGGTTATCCACAGAATCAGGGGATAACGCAGGGAAAG  
AACATGTGAGCAAAGGCCAGCAAAGGCCAGGAACCGTAAAAAGGCCGCGTTGCTGGCGTT  
TTCCATAGGCTC

>CS5\_Common F\_RAE F  
GGGCTTCTTAATACGGACACGAACAAAGTGCGGATGAGGCACGACCGCCATAATCACTCTC  
GTACGGATGCTGTGAGCGGACGTATCTCTAAGAAGTAGCAGGTACCGAGCTGTCTAGAGGAA  
TAAACATGCTGTTCCGTTTAAAAAAAAAAAAA

>CS6\_Common F\_RAE F  
GGCCTTCTTAATACGGACACGAACAAAGTGCGGATGAGGCACGACCGCCATAATCACTCTCG  
TACGGATGCTGTGAGCGGACGTATCTCTAAGAAGTAGCAGATAACTCGAAAATAGCGCAGTA  
TGTGCGCTCCAACCGAGGAACCGATCTCGTTTACCACGAGGGAAACACCTACACACCCAATG  
AAAAGCTGAGGGAGGGACAAAAGAGTCGAGACTGGAAGTGCTCAATGTACCATAAGGCCAAG  
TGCCGGGCCCGCCTGGTTACTCGCATTACCGGTGGAGGGGATATTATACACGTGACCAGCAA  
CCTGCACACACATCCACAATGTACACCACGCAGAAAACGGACATTAGCGTGGTTGACCAGA  
AACTGTGCCTCGAAAGGAATCCACTCTGCGTTAACACTCGATCGATTAAAATGTAGATCAAG  
TAAAGACCACCGACTGATTACTCGTTACGATTAGCATGATCTTCAGTATAAATAACGTTTAA  
GATTTAAAAAGTATTAAAAAATGCTCATATACATTTCAACAAAAAAAAAAAAA

>CS7\_Common F\_RAD F  
GAAGCTGAGGGAGGGACAAAAGAGTCGAGACTGGAAGTGCTCAATGTACCATAAGGCCAAGT  
GCCGGGCCCGCTGGTTACTCGCATTACCGGTGGAGGGGATATTATACACGTGACCAGCAAC  
CTGCACACACATCCACAATGTACACCACGCAGAAAACGGACATTAGCGTGGTTGACCAGAA  
ACTGTGCCTCGAAAGGAATCCACTCTGCGTTAACACTCGATCGATTAAAATGTAGATCAAGT  
AAAGACCACCGACTGATTACTCGTTACGATTAGCATGATCTTCAGTATAAATAACGTTTAA  
ATTTAAAAAGTATTAAAAAATGCTCATATACATTTCAATAAAAAAAAAAAAAA

>CS8\_Common F  
ACTAGTACGGCCGCGCAGTGTGCTGGAATTCGCCCTTTACGAGCGGTGGCGGAGTGACGGCGA  
CCACTTCCAAGGCTGTGGTCAAGCAACAGTCCCAGAACTACAGTGAATCATCGTTTGTGAC  
ACCAGCGGGGATCAGGGCAACACAGAGGCTCAAGGACATCTTTCGACATTGCGCCATCTCCC  
AGTTGAGGCCATATTTGATGCGGACGGCAAACAGATGGACTTCATACCCAACATTCGCGTCA  
TCCGAAGTCAGCGGAAGACCATAAAGCTGATGTTTTAAAAAATATGCCTACTCGAAGACCAAC  
GAGCACGATACCACAACCTACTGGCACTGCCGAAGTCGTCGCAATGGAAGGCCTGCGTGCAA  
GGCCCGTTTTCCACCAAGAAGCTCAAGAACGGTAGCTACAAAGTATATCTGACCCAGCCGG  
AGCACAATCATCCCCAAAGAAGCGTCGCTATAATCAGAATAACTATATTTTTAAGAAGAAT  
GATATATTAAGAGCCATGTCTTGCCAAAATGACTTGCACCGACTCCCCAAAAAAAAAAAAAAC  
CTATAGTGAGTCGTATTAATCTGTGCTCGCAAGGGCGAATTCGTCAGATATCCATCACACT  
GGCGCCGCTCGAGCATGCATCTAGAGGGCCCAATTCGCCCTATAGTGAGTCGTATTACAAT  
TCACTGGCCGTCGTTTTACAACGTCGTGACTGGGAAAACCTGGCGTTACCCAACCTAATCG  
CCTTGACACATCCCCCTTCGCCAGCTGGCGTAATAGCGAAGAGGCCCGCACCAGATCGCC  
CTTCCCAACAGTTGCGCAGCCTGAATGGCGAATGGACGCGCCCTGTAGCGGCGCATTAAGCG  
CGGCGGGTGTGGTGGTTACGCGCAGCGTGACCGCTACACTTGCCAGCGCCCTAGCGCCCGCT  
CCTTCGCTTTCTTCCCTTCTTCTCGCACGTTTCGCGGGCTTTCCTCCCGTCAAGCTCTAATC  
GGGGCTCCCTTA

>CS9\_Common F\_RW F  
GGAGGCCTGCGTGCAAGGCCCGTTTTCCACCAAGAAGCTCAAGAACGGTAGCTACAAAGTA  
TATCTGACCCAGCCGGAGCACAATCATCCCCAAAGAAGCGTCGCCTATAATCAGAATAACT  
ATATTTAAGAAGAATGATATATTAAGAGCCATGTCTTGGCAAAATGAAAAAAAAAAAAA

>CS10\_Common F\_RV F  
CTCACATGGTGGACAAAAGTGTCGCTCGCGCGTCTTACCATCAACGACGTTGTCTGTCCG  
CTTAACCGATTCCACACGCATGAGGAGATCGTGGCGGAAAGAAGCGAGTGGCCCGCGTGGC  
GCCGTTGGAGACGATTGCCAAGGTGGTTGCCACAACACCCAGGCATCCGCAGCATCAACAGA

CAACCCAGCAGCAACAAGAGATTCAGCTGACCAGCGATGCAATTGCTGGAGCAATACTGGAC  
GATGAATCCCCAGCTACAATCGATGTCAGCGAGCTGGGGATGCATCTGAAATACGAAGAAAT  
CGTAGCGGATGTCACGGGCATTGTGGGCGGCACGCGAGTGGTCAGTCGCCGAAAGTGAATAT  
TGCTTTTTATTTCTGACGTAAGATCGCAGATTCAGATTCCCTTCTTTGTAAAACTCATGCT  
TTGAGTTTTCATTTTTGAACTTGCCACGTCGAAAACCAAGAGCCGAACAGTTTTTGATGAATT  
TAAAAAGGCTAAGCACAACCACTAGCCAATAAATACAATTTTTATTATTATTTAAGGACAAA  
AAAAAAAAA

>CS11\_Common F\_RV F

GTGTCGCTCGCGCTCTTACCATCAACGACGTTGTCTGTCCGCTTAACCGATTCCACACGC  
ATGAGGAGATCGTGCGGCGAAAGAAGCGAGTGCGCCGCTGCCGCCGGTGGAGACGATTGCC  
AAGGTGGTTGCCACAACACCCAGGCATCCGCAGCATCAACAGACAACCCAGCAGCAACAAGA  
GATTCAGCTGACCAGCGATGCAATTGCTGGAGCAATACTGGACGATGAATCCCCAGCTACAA  
TCGATGTCAGCGAGCTGGGGATGCATCTGAAATACGAAGAAATCGTAGCGGATGTCACGGGC  
ATTGTGGGCGGCACGCGAGTGGTCAGTCGCCGAAAGTGAATATTGCTTTTTATTTCTGACG  
TAAGATCGCAGATTCAGATTCCCTTCTTTGTAAAACTCATGCTTTGAGTTTTCATTTTTGAA  
CTTGCCACGTCGAAAACCAAGAGCCGAACAGTTTTTGATGAATTTAAAAAGGCTAAGCACAAC  
CACTAGCCAATAAATACAATTTTTATTATTATTTAAGGACATTTTTTAAAACCTTTTTTAT  
TAAGCGTAATATTCGAAGGTTCCCTCCCCATTTGTAAAAATTTGATAAATACCCCATGATTT  
CCTTTGACATTTTGAGTTGTTTAGAATAAAATCTGTTCCCTTCTGTTATGCCTTTGTTCAA  
CAAAAAAAAAA

>CS12\_Common F\_RV F

TGCACATGGTGGACCAAAGTGTGCTCGCGCTCTTACCATCAACGACGTTGTCTGTCCG  
CTTAACCGATTCCACACGCATGAGGAGATCGTGCGGCGAAAGAAGCGAGTGCGCCGCTGCC  
GCCGGTGGAGACGATTGCCAAGTGGTTGCCACAACACCCAGGCATCCGCAGCATCAACAGA  
CAACCCAGCAGCAACAAGAGATTCAGCTGACCAGCGATGCAATTGCTGGAGCAATACTGGAC  
GATGAATCCCCAGCTACAATCGATGTCAGCGAGCTGGGGATGCATCTGAAATACGAAGAAAT  
CGTAGCGGATGTCACGGGCATTGTGGGCGGCACGCGAGTGGTCAGTCGCCGAAAGTGAATAT  
TGCTTTTTATTTCTGACGTAAGATCGCAGATTCAGATTCCCTTCTTTGTAAAACTCATGCT  
TTGAGTTTTCATTTTTGAACTTGCCACGTCGAAAACCAAGAGCCGAACAGTTTTTGATGAATT  
TAAAAAGGCTAAGCACAACCACTAGCCAATAAATACAATTTTTATTATTATTTAAGGACATA  
TTTTTAAAACCTTTTTTATTAAGCGTAATATTCGAAGGTTCCCTCCCCATTTGTAAAAATTT  
GATAAATACCCCATGATTTCCCTTGACATTTTGAGTTGTTTAGAATAAAATCTGTTCCCTT  
TGTTATGCCTTTGTTCAAACAAAATTGACCTAGCCTACTCCATAATTATTAATACAAAACCT  
GCGTTTAAGAAGGCGGACAAGCTAGCTATTATGATACAGCTTACAACAATTTATTATGTGT  
ACATTTAATAAACGTAAGACCCAAACAGTGCAAAAAAAAAA
